# Supplementary material for: The Chromosomal Polymorphism Linked to Variation in Social Behavior in the White-Throated Sparrow ( Zonotrichia albicollis ) Is a Complex Rearrangement and Suppressor of Recombination
Source: Oxford University Press journal article supplement (doi:10.1534/genetics.108.088229), 2008-06-18
Supplement: genetics.108.088229-2.doc [file genetics.108.088229-2.doc]

Supplementary Figure 1. Phylogenies of sparrow sequences of 9 different loci located within the region rearranged between ZAL2 and ZAL2m chromosomes. For each loci, non-rooted trees of 6 WS and 4 TS *Z. albicollis* birds and one individual of *Z. querula* (ZQU), *Z. leucophrys* (ZLE), and *Junco hyemalis* (JHY) were obtained by neighbor-joining using the amount of sequence common to all of them (indicated within parenthesis). For WS individuals the sequences of the ZAL2 and ZAL2m chromosomes are labeled respectively as 2 and 2m. For the other individuals, the two estimated haplotypes of each gene were designated as A and B (in the case of ZQU, ZLE and JHY, nucleotide variants were assigned randomly to one or another haplotype). Branch lengths correspond to the number of nucleotide substitutions per position according to the BASEML module of the PAML program(Yang 1997). The phylogenetic trees of these genes, with ZAL2 or ZAL2m sequences forming separate clusters with high bootstrap support, contrast with those of the three additional genes located in the tip of chromosome 2 or chromosome 1, in which ZAL2 and ZAL2m sequences cluster together with the sequences of the other species as outgroups (data not shown).
